# Supplementary figures and images for: Multiple therapeutic effects of human neural stem cells derived from induced pluripotent stem cells in a rat model of post-traumatic syringomyelia
Source: PubMed Central journal article supplement — eBioMedicine. 2022 Feb 16;77:103882. doi: 10.1016/j.ebiom.2022.103882 (PMC8857569; doi:10.1016/j.ebiom.2022.103882), 2022-02-16

Figure S1

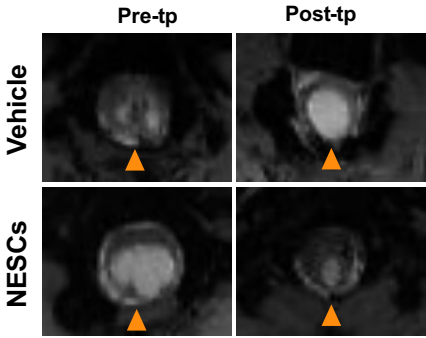

Figure S2

a

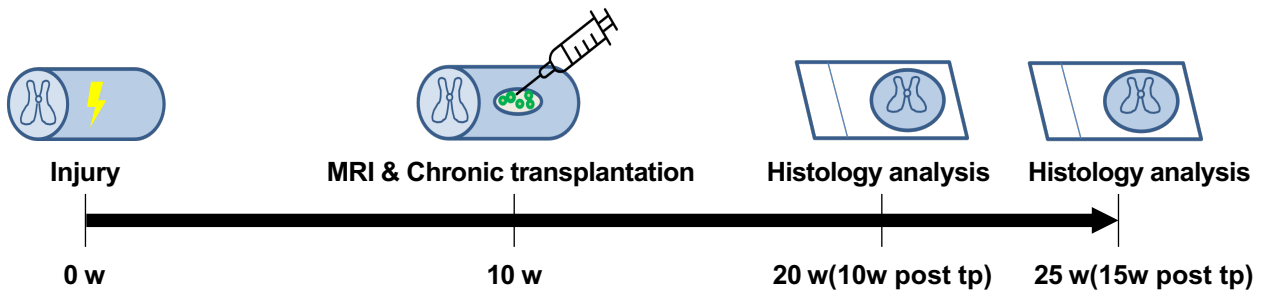

b

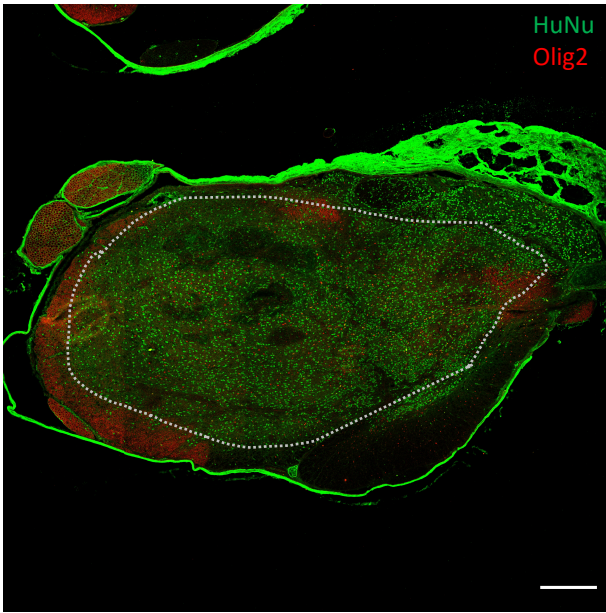

c

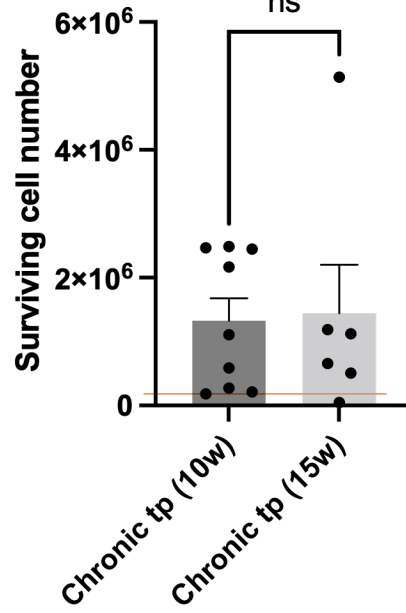

d

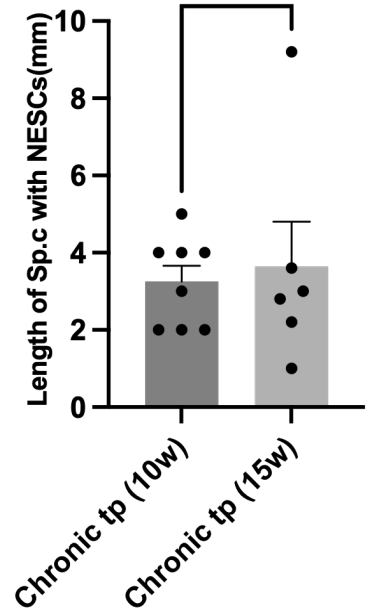

e

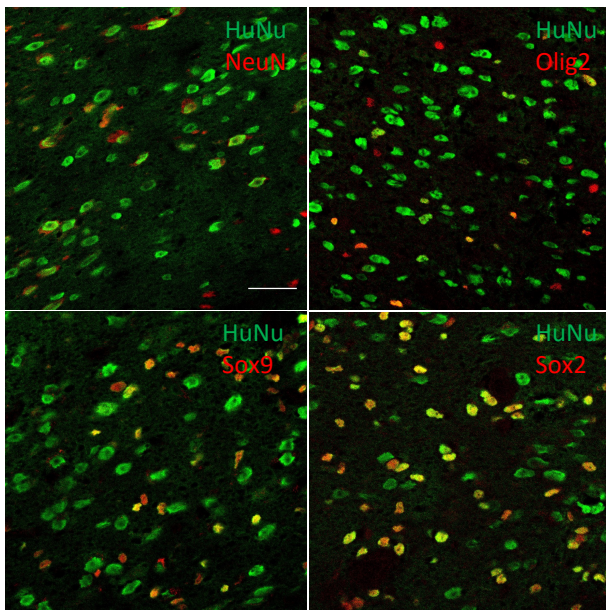

f

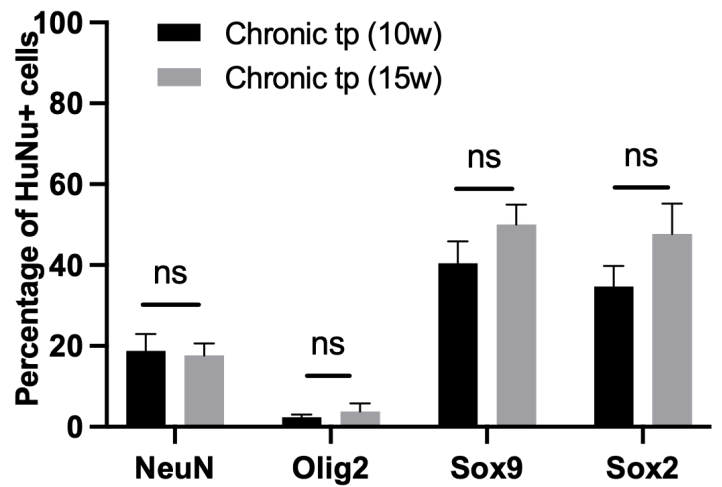

Figure S3

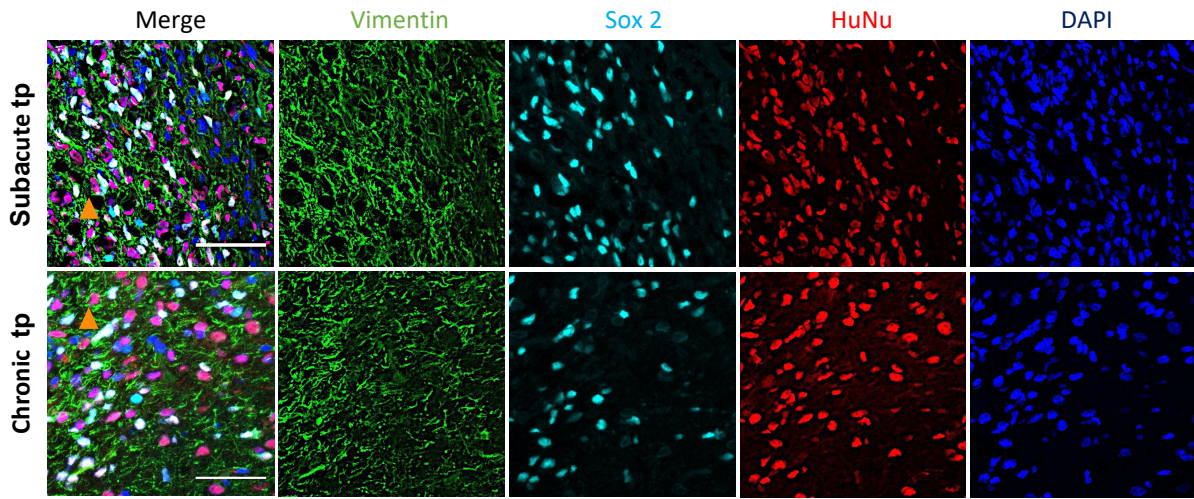

Figure S4

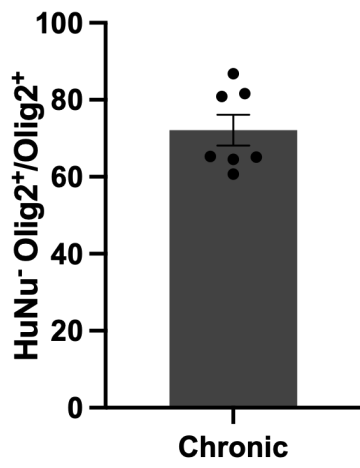

Figure S5

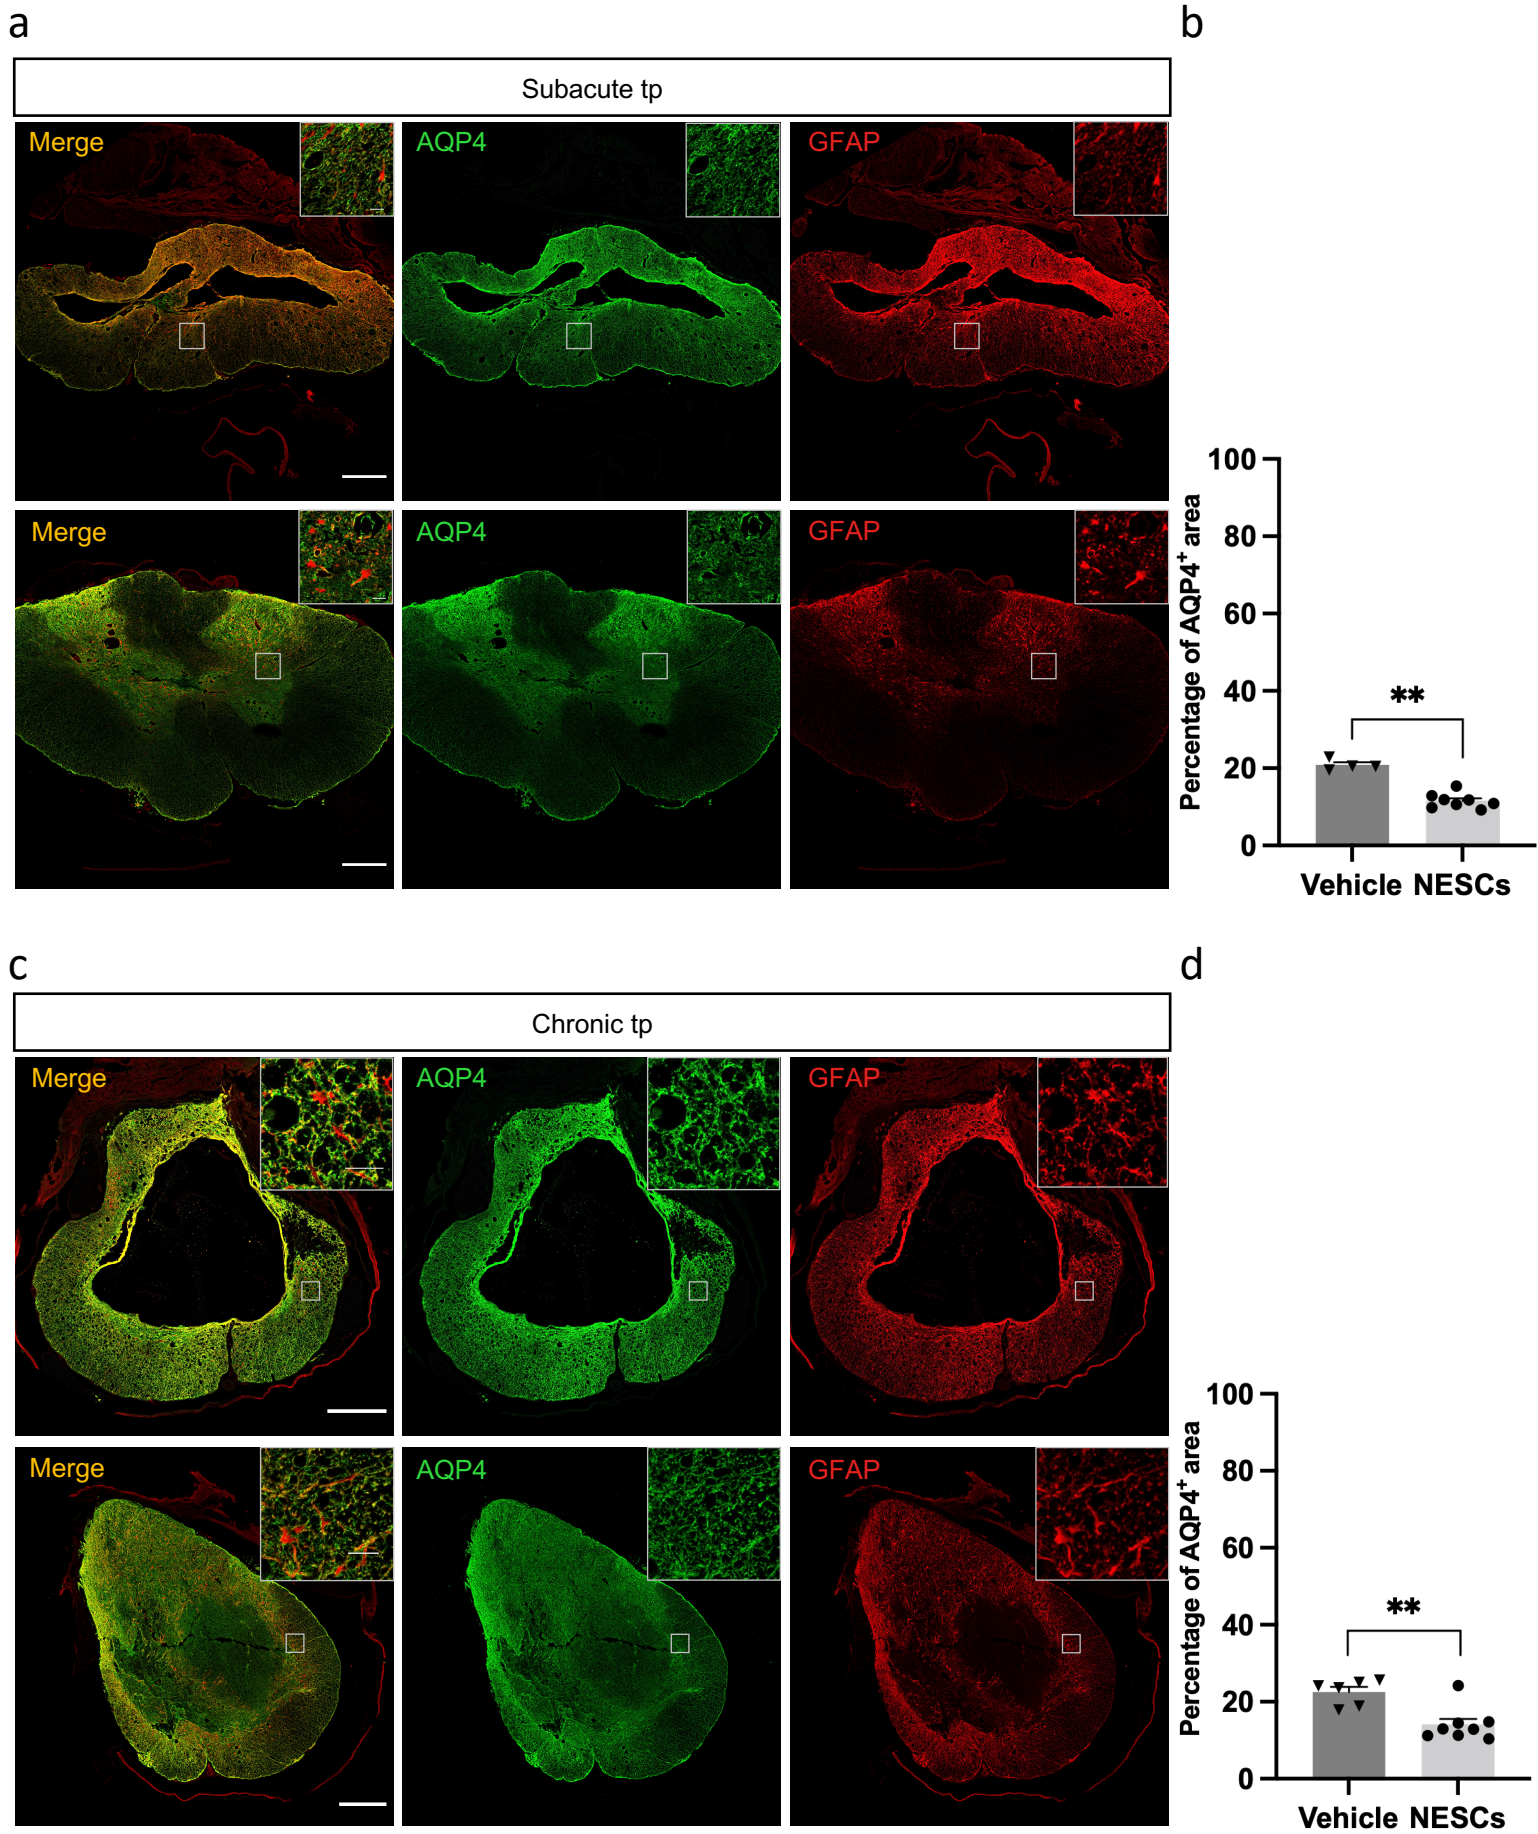

Figure S6

a

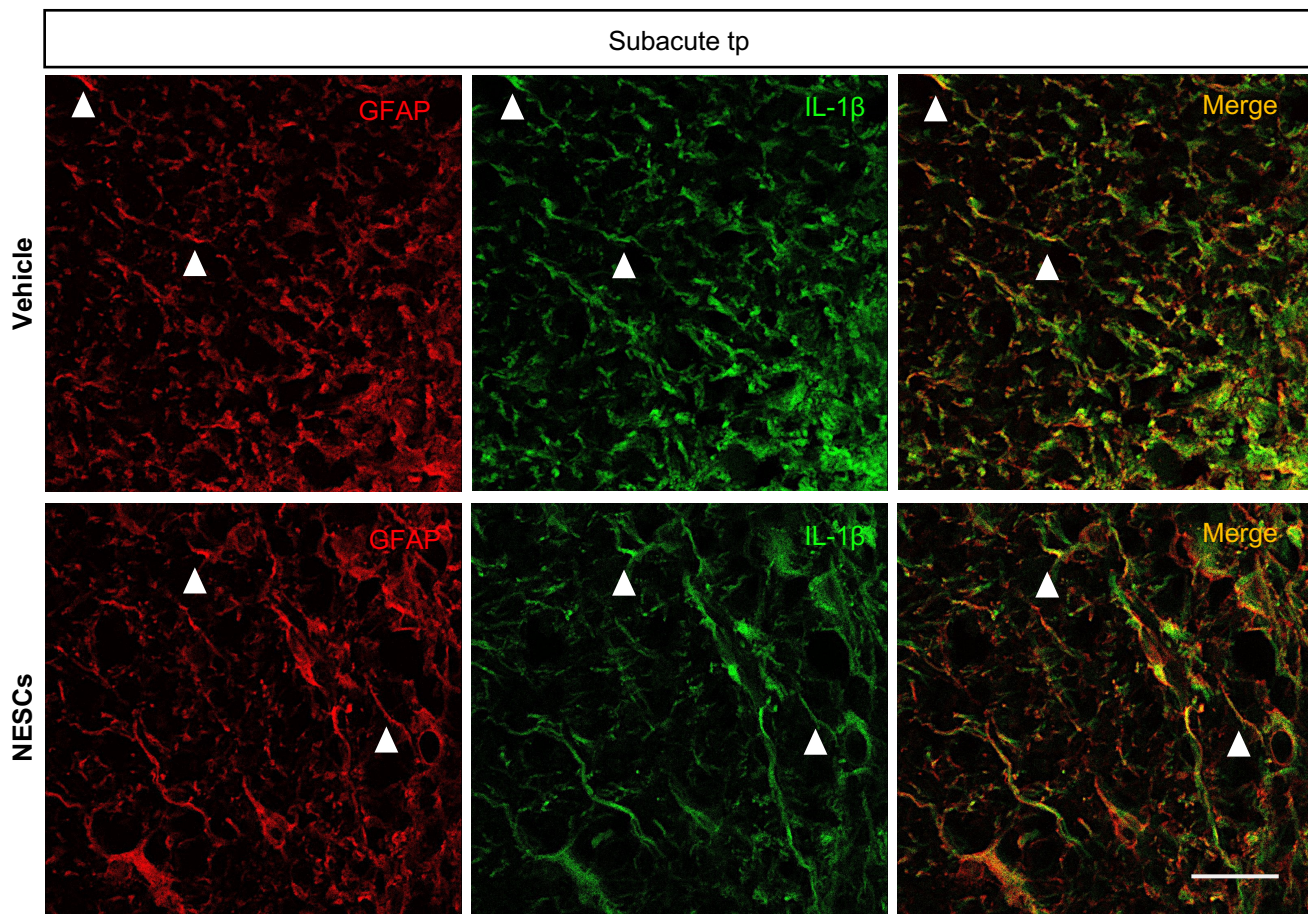

b

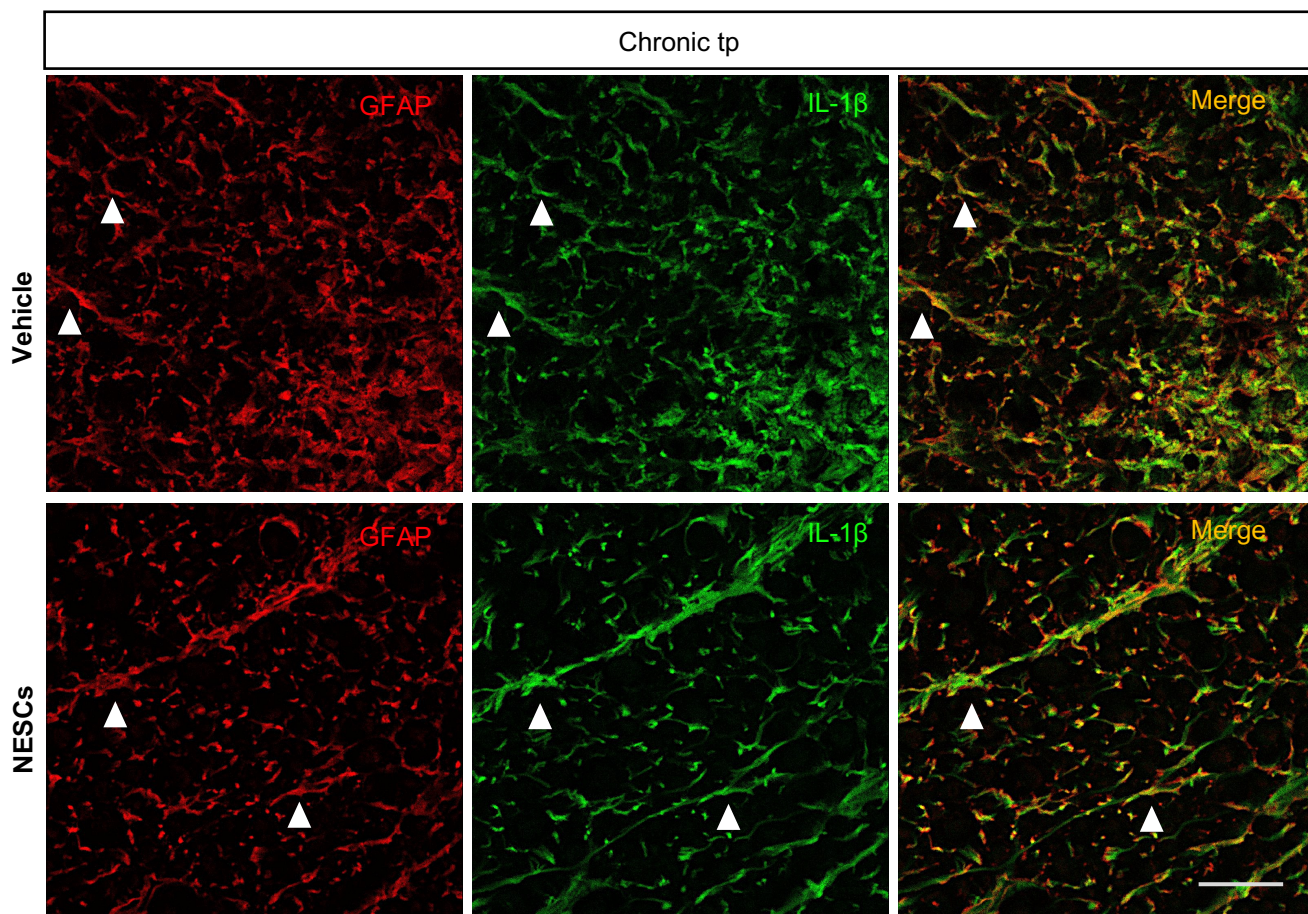

Figure S7

a

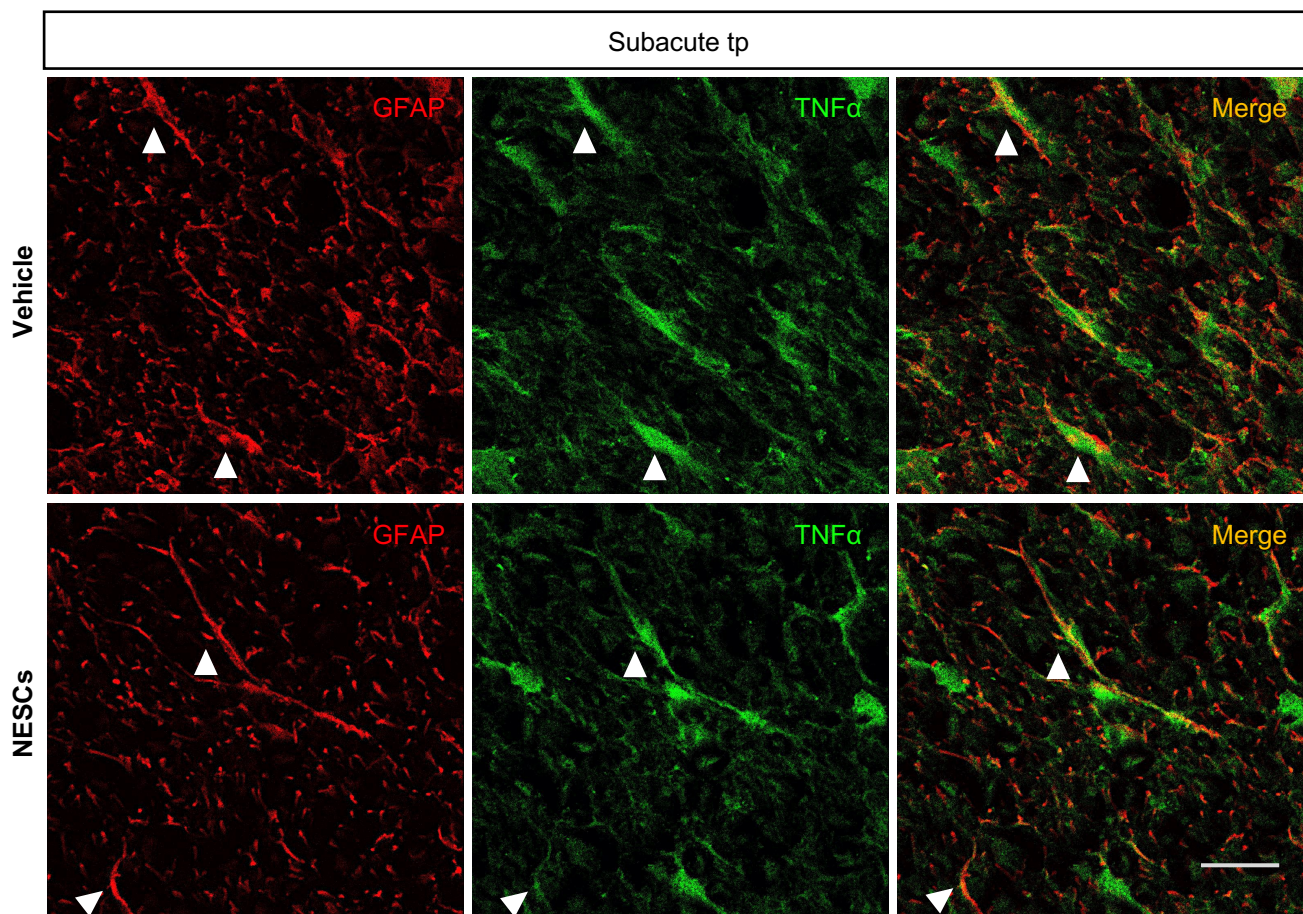

b

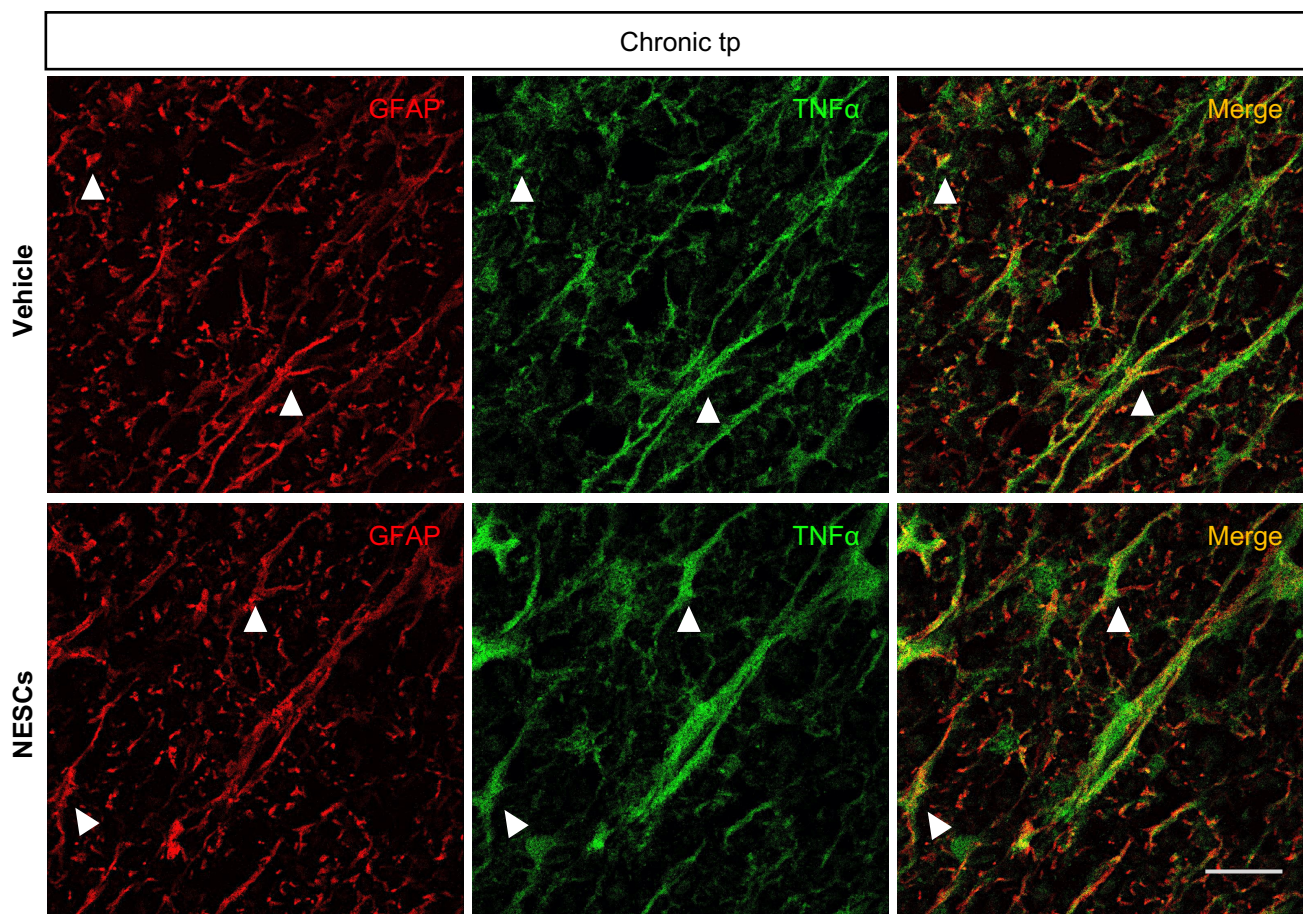

Figure S8

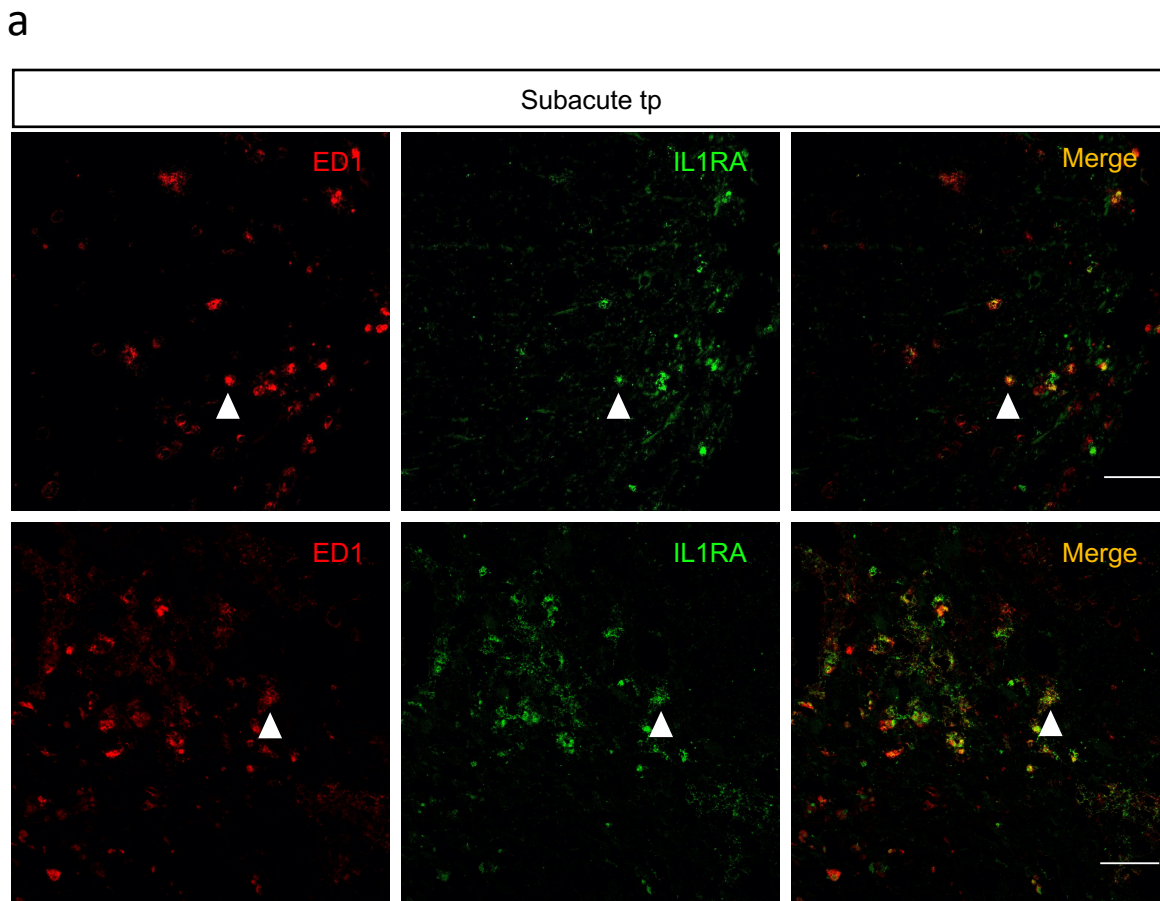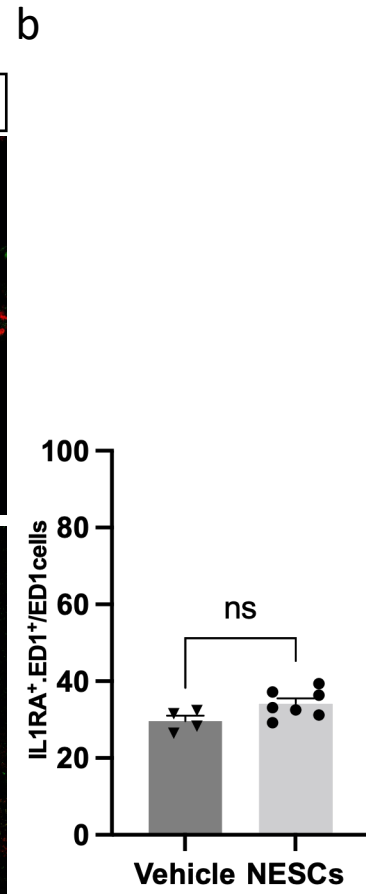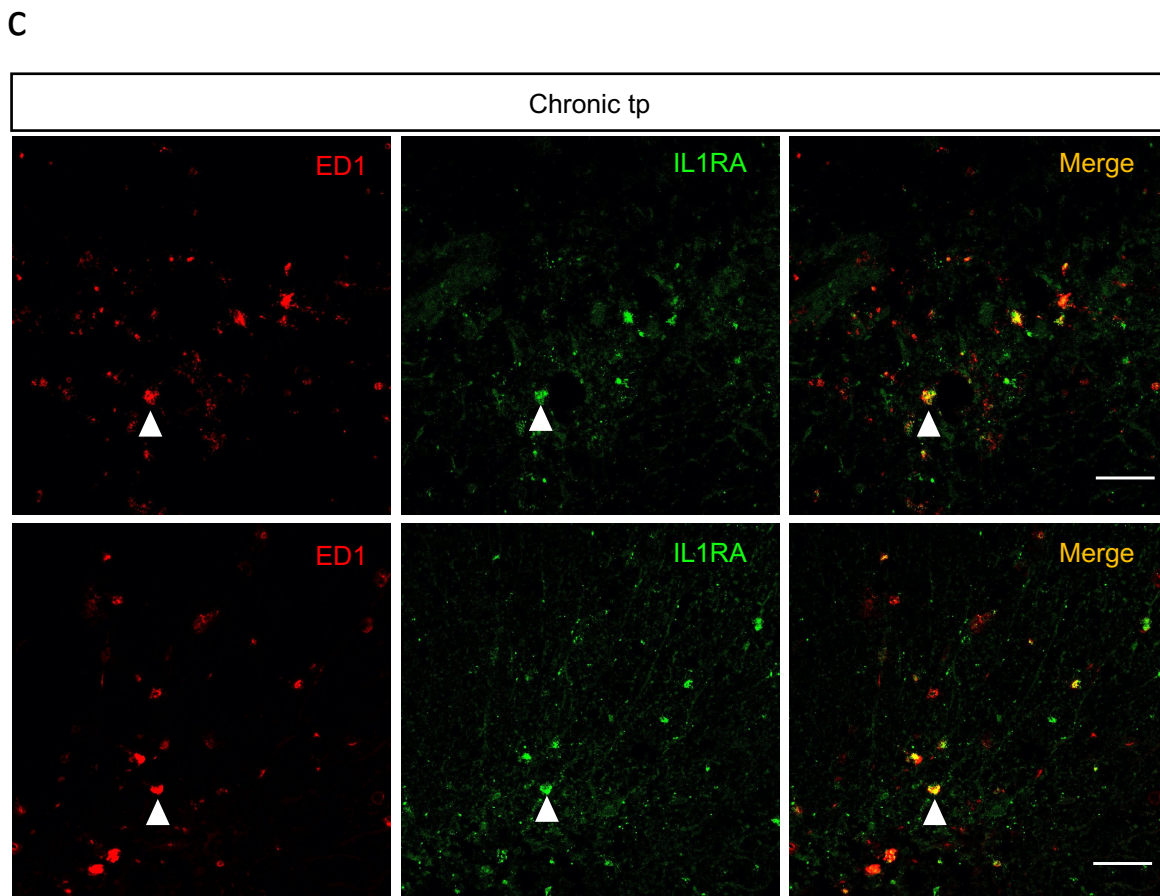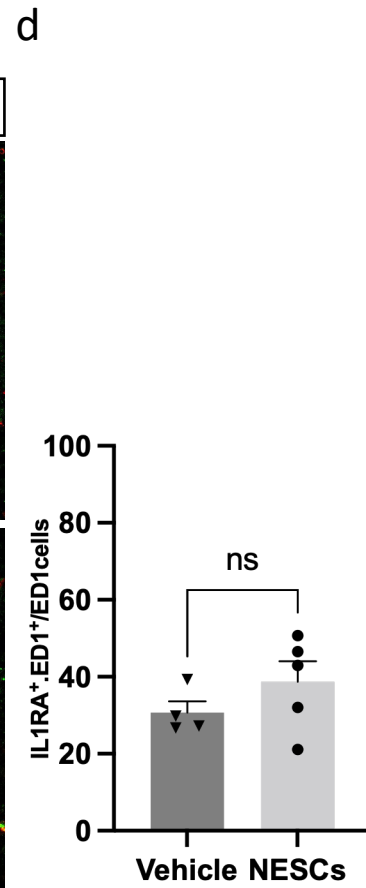

Supplement: mmc2.pdf [file mmc2.pdf]
